# Supplementary material for: Music playschool enhances children’s linguistic skills
Source: PubMed Central journal article supplement (PMC5993803; doi:10.1038/s41598-018-27126-5), 2018-06-08
Supplement: 41598_2018_27126_MOESM1_ESM.pdf [file 41598_2018_27126_MOESM1_ESM.pdf]

### Supplementary information

**Table S1** The main effects and interactions for *Phoneme processing* test scores. The significant results are marked in bold.

| Main effects and interactions                                | <i>F</i>                  | <i>p</i>                 |
|--------------------------------------------------------------|---------------------------|--------------------------|
| <i>Time</i>                                                  | <i>F</i> (1, 177)=142.997 | <b><i>p</i>&lt; .001</b> |
| <i>Music playschool</i>                                      | <i>F</i> (1, 55)=8.121    | <b><i>p</i>=.006</b>     |
| <i>Dance lessons</i>                                         | <i>F</i> (1,55)=3.232     | <i>p</i> =.078           |
| <i>Mother's education</i>                                    | <i>F</i> (1,55)=.584      | <i>p</i> =.448           |
| <i>Music playschool x Time</i>                               | <i>F</i> (1, 175)=8.547   | <b><i>p</i>=.004</b>     |
| <i>Dance lessons x Time</i>                                  | <i>F</i> (1,176)=1.652    | <i>p</i> =.200           |
| <i>Mother's education x Time</i>                             | <i>F</i> (1,176)=.779     | <i>p</i> =.379           |
| <i>Music playschool x Mother's education</i>                 | <i>F</i> (1,55)=.898      | <i>p</i> =.347           |
| <i>Dance lessons x Mother's education</i>                    | <i>F</i> (1,55)=.355      | <i>p</i> =.554           |
| <i>Music playschool x Dance lessons</i>                      | <i>F</i> (1,55)=2.884     | <i>p</i> =.095           |
| <i>Music playschool x Dance lessons x Time</i>               | <i>F</i> (1,176)=.678     | <i>p</i> =.411           |
| <i>Music playschool x Time x Mother's education</i>          | <i>F</i> (1,176)=1.815    | <i>p</i> =.180           |
| <i>Dance lessons x Time x Mother's education</i>             | <i>F</i> (1,176)=2.284    | <i>p</i> =.133           |
| <i>Music playschool x Dance lessons x Mother's education</i> | <i>F</i> (1,55)=1.836     | <i>p</i> =.181           |

**Table S2** The main effects and interactions for *Vocabulary* test scores. The significant results are marked in bold.

| Main effects and interactions | <i>F</i>                 | <i>p</i>                 |
|-------------------------------|--------------------------|--------------------------|
| <i>Time</i>                   | <i>F</i> (1, 176)=95.535 | <b><i>p</i>&lt; .001</b> |
| <i>Music playschool</i>       | <i>F</i> (1,55)=2.722    | <i>p</i> =.105           |
| <i>Dance lessons</i>          | <i>F</i> (1,55)=2.667    | <i>p</i> =.108           |
| <i>Mother's education</i>     | <i>F</i> (1,55)=1.795    | <i>p</i> =.186           |

|                                                              |                     |                            |
|--------------------------------------------------------------|---------------------|----------------------------|
| <i>Music playschool x Time</i>                               | $F(1, 174)=7.301$   | <b><math>p=.008</math></b> |
| <i>Dance lessons x Time</i>                                  | $F(1,175)=.019$     | $p=.892$                   |
| <i>Mother's education x Time</i>                             | $F(1,175)=.004$     | $p=.950$                   |
| <i>Music playschool x Mother's education</i>                 | $F(1,55)=.097$      | $p=.757$                   |
| <i>Dance lessons x Mother's education</i>                    | $F(1, 55)= 4.953$   | <b><math>p=.030</math></b> |
| <i>Music playschool x Dance lessons</i>                      | $F(1,55)=2.540$     | $p=.117$                   |
| <i>Music playschool x Dance lessons x Time</i>               | $F(1, 175)= 10.767$ | <b><math>p=.001</math></b> |
| <i>Music playschool x Time x Mother's education</i>          | $F(1,175)=2.101$    | $p=.149$                   |
| <i>Dance lessons x Time x Mother's education</i>             | $F(1,175)=3.662$    | $p=.057$                   |
| <i>Music playschool x Dance lessons x Mother's education</i> | $F(1,55)=2.511$     | $p=.119$                   |

**Table S3** The main effects and interactions for *Perceptual reasoning index* scores (i.e. the sum Block desing and Matrix reasoning scores). The significant results are marked in bold.

| Main effects and interactions                | $F$                | $p$                            |
|----------------------------------------------|--------------------|--------------------------------|
| <i>Time</i>                                  | $F(1, 176)=99.424$ | <b><math>p&lt; .001</math></b> |
| <i>Music playschool</i>                      | $F(1,56)=.112$     | $p=.739$                       |
| <i>Dance lessons</i>                         | $F(1,56)=.581$     | $p=.449$                       |
| <i>Mother's education</i>                    | $F(1,56)=.000$     | $p=.991$                       |
| <i>Music playschool x Time</i>               | $F(1,175)=.545$    | $p=.461$                       |
| <i>Dance lessons x Time</i>                  | $F(1,175)=.725$    | $p=.396$                       |
| <i>Mother's education x Time</i>             | $F(1,175)=1.062$   | $p=.304$                       |
| <i>Music playschool x Mother's education</i> | $F(1,56)=.018$     | $p=.893$                       |
| <i>Dance lessons x Mother's education</i>    | $F(1,56)=.436$     | $p=.512$                       |
| <i>Music playschool x Dance lessons</i>      | $F(1,56)=.056$     | $p=.813$                       |

|                                                                      |                   |                            |
|----------------------------------------------------------------------|-------------------|----------------------------|
| <i>Music playschool x<br/>Dance lessons x<br/>Time</i>               | $F(1,175)=1.817$  | $p=.179$                   |
| <i>Music playschool x<br/>Time x<br/>Mother's education</i>          | $F(1,175)=.497$   | $p=.482$                   |
| <i>Dance lessons x<br/>Time x<br/>Mother's education</i>             | $F(1, 175)=4.320$ | <b><math>p=.039</math></b> |
| <i>Music playschool x<br/>Dance lessons x<br/>Mother's education</i> | $F(1, 56)=6.721$  | <b><math>p=.012</math></b> |

**Table S4** The main effects and interactions for *Inhibition* test scores. The significant results are marked in bold.

| Main effects and interactions                                        | $F$               | $p$                        |
|----------------------------------------------------------------------|-------------------|----------------------------|
| <i>Time</i>                                                          | $F(1, 179)=9.103$ | <b><math>p=.003</math></b> |
| <i>Music playschool</i>                                              | $F(1,55)=.010$    | $p=.922$                   |
| <i>Dance lessons</i>                                                 | $F(1,55)=.199$    | $p=.657$                   |
| <i>Mother's education</i>                                            | $F(1,55)=1.105$   | $p=.298$                   |
| <i>Music playschool x<br/>Time</i>                                   | $F(1,176)=1.536$  | $p=.217$                   |
| <i>Dance lessons x<br/>Time</i>                                      | $F(1,178)=.963$   | $p=.328$                   |
| <i>Mother's education x<br/>Time</i>                                 | $F(1,177)=.124$   | $p=.725$                   |
| <i>Music playschool x<br/>Mother's education</i>                     | $F(1,55)=3.308$   | $p=.074$                   |
| <i>Dance lessons x<br/>Mother's education</i>                        | $F(1,54)=.618$    | $p=.435$                   |
| <i>Music playschool x<br/>Dance lessons</i>                          | $F(1,54)=.163$    | $p=.688$                   |
| <i>Music playschool x<br/>Dance lessons x<br/>Time</i>               | $F(1,177)=.016$   | $p=.900$                   |
| <i>Music playschool x<br/>Time x<br/>Mother's education</i>          | $F(1,177)=.009$   | $p=.925$                   |
| <i>Dance lessons x<br/>Time x<br/>Mother's education</i>             | $F(1,177)=1.246$  | $p=.266$                   |
| <i>Music playschool x<br/>Dance lessons x<br/>Mother's education</i> | $F(1,54)=.001$    | $p=.973$                   |
